# Supplementary material
Source: PubMed Central journal article supplement (PMC6056877)
Supplement: IAI.00215-18_zii999092487s1.pdf [file IAI.00215-18_zii999092487s1.pdf]

**Supp. Figure 1. Cellular PI3K activity is required for phagocytosis of *Pseudomonas aeruginosa* and *Staphylococcus aureus*.**

Murine WT BMDCs were assayed for phagocytosis of the indicated (A) *Pseudomonas aeruginosa* (MOI=10) and (B) *Staphylococcus aureus* (MOI=1) bacterial strains without, or after, treatment with 100  $\mu$ M LY-294002. Uptake is quantified as percent phagocytosis of the respective bacterial strain in untreated cells. Data are accumulated from at least two independent biological experiments and analyzed using the unpaired t-test with Welch's correction ( $n = 8$ ). \*\*\*,  $p \leq 0.0005$  compared to untreated cells.
