# Supplementary material
Source: PubMed Central journal article supplement (PMC6056877)
Supplement: IAI.00215-18_zii999092487s3.pdf [file IAI.00215-18_zii999092487s3.pdf]

**Table 1. Bacterial strains used in this study**

| <b>Strain</b>                           | <b>Genotype/Description</b>                                                                                         | <b>Phenotype</b>                                 |
|-----------------------------------------|---------------------------------------------------------------------------------------------------------------------|--------------------------------------------------|
| <i>P. aeruginosa</i> PA14               | non-mucoid clinical isolate, WT                                                                                     | Fully assembled flagellum, swimming competent    |
| PA14 <i>motABmotCD</i>                  | $\Delta$ <i>motAB</i> $\Delta$ <i>motCD</i> , flagellar stator proteins                                             | Fully assembled flagellum, non-swimming          |
| PA14 <i>flgK</i>                        | <i>flgK::Tn5</i> flagellar hook protein                                                                             | No flagellum, non-swimming                       |
| PA14 <i>fliC</i>                        | $\Delta$ <i>fliC</i> , flagellin monomer                                                                            |                                                  |
| PA14 <i>waaLmotABmotCD</i>              | $\Delta$ <i>waaL</i> , O-antigen ligase and $\Delta$ <i>motAB</i> $\Delta$ <i>motCD</i> , flagellar stator proteins | Fully assembled flagellum, non-swimming          |
| PA14 <i>pilA</i>                        | $\Delta$ <i>pilA</i> , pilin                                                                                        | Lacks pili, twitch defective, swimming competent |
| PA14 <i>pilB</i>                        | $\Delta$ <i>pilB</i> , ATPase for pilus assembly                                                                    | Lacks pili, twitch defective, swimming competent |
| PA14 <i>pilG</i>                        | $\Delta$ <i>pilG</i> , CheY-like response regulator of pilus                                                        | Lacks pili, twitch defective, swimming competent |
| <i>P. aeruginosa</i> PA01               | WT                                                                                                                  | Fully assembled flagellum, swimming competent    |
| <i>P. aeruginosa</i> PA103              | WT                                                                                                                  | No flagella, non-swimming                        |
| <i>P. aeruginosa</i> PAK                | WT                                                                                                                  | Fully assembled flagellum, swimming competent    |
| <i>Escherichia coli</i> K12 <i>fliC</i> | $\Delta$ <i>fliC</i> , flagellin monomer                                                                            | No flagella, non-swimming                        |
| <i>Vibrio Cholerae</i> O395 <i>motX</i> | $\Delta$ <i>motX</i> , flagellar stator protein                                                                     | Fully assembled flagellum, non-swimming          |
| <i>Klebsiella pneumoniae</i> KPPR1      | WT                                                                                                                  | No flagellum, non-swimming                       |
| <i>Staphylococcus aureus</i> USA300     | WT strain of community-associated methicillin-resistant <i>S. aureus</i>                                            | Gram positive, no flagellum, non-swimming        |
| <i>S. aureus</i> rn4220                 | WT                                                                                                                  | Gram positive, no flagellum, non-swimming        |
| <i>Bacillus subtilis</i> JH642          | WT                                                                                                                  | Gram positive                                    |
