# Supplementary material
Source: PubMed Central journal article supplement (PMC6056877)

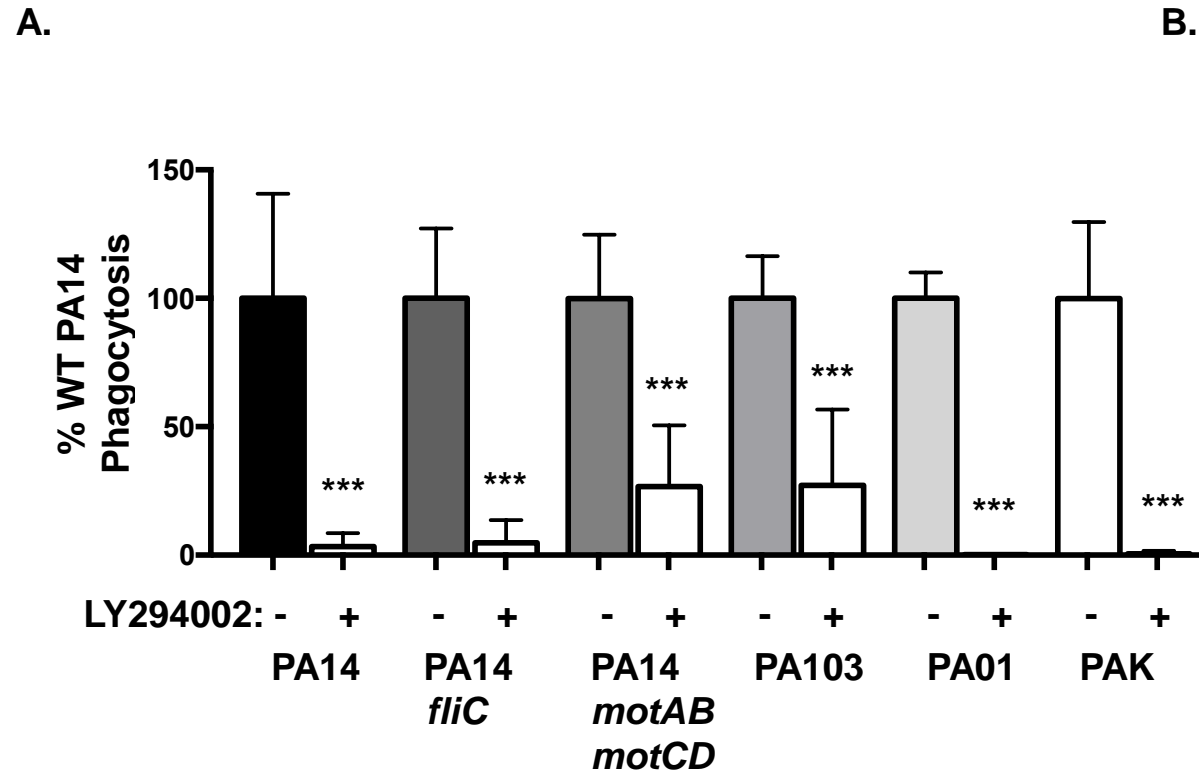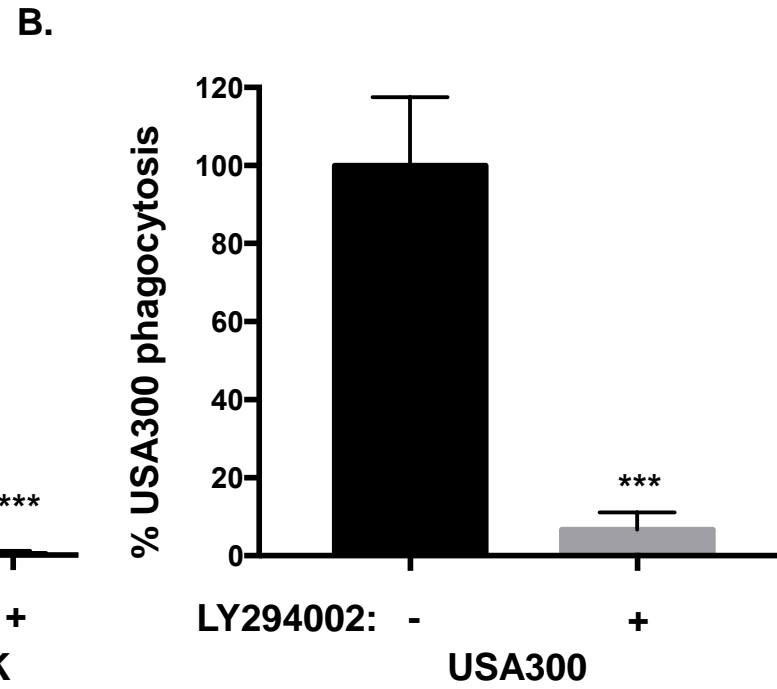

Supplement: IAI.00215-18_zii999092487s2.pdf [file IAI.00215-18_zii999092487s2.pdf]
